# Supplementary material for: Peculiarities of the Acetylcholine Action on the Contractile Function of Cardiomyocytes from the Left and Right Atria in Rats
Source: MDPI journal article supplement (doi:10.3390/cells11233809), 2022-11-28
Supplement: s1 [file s1]

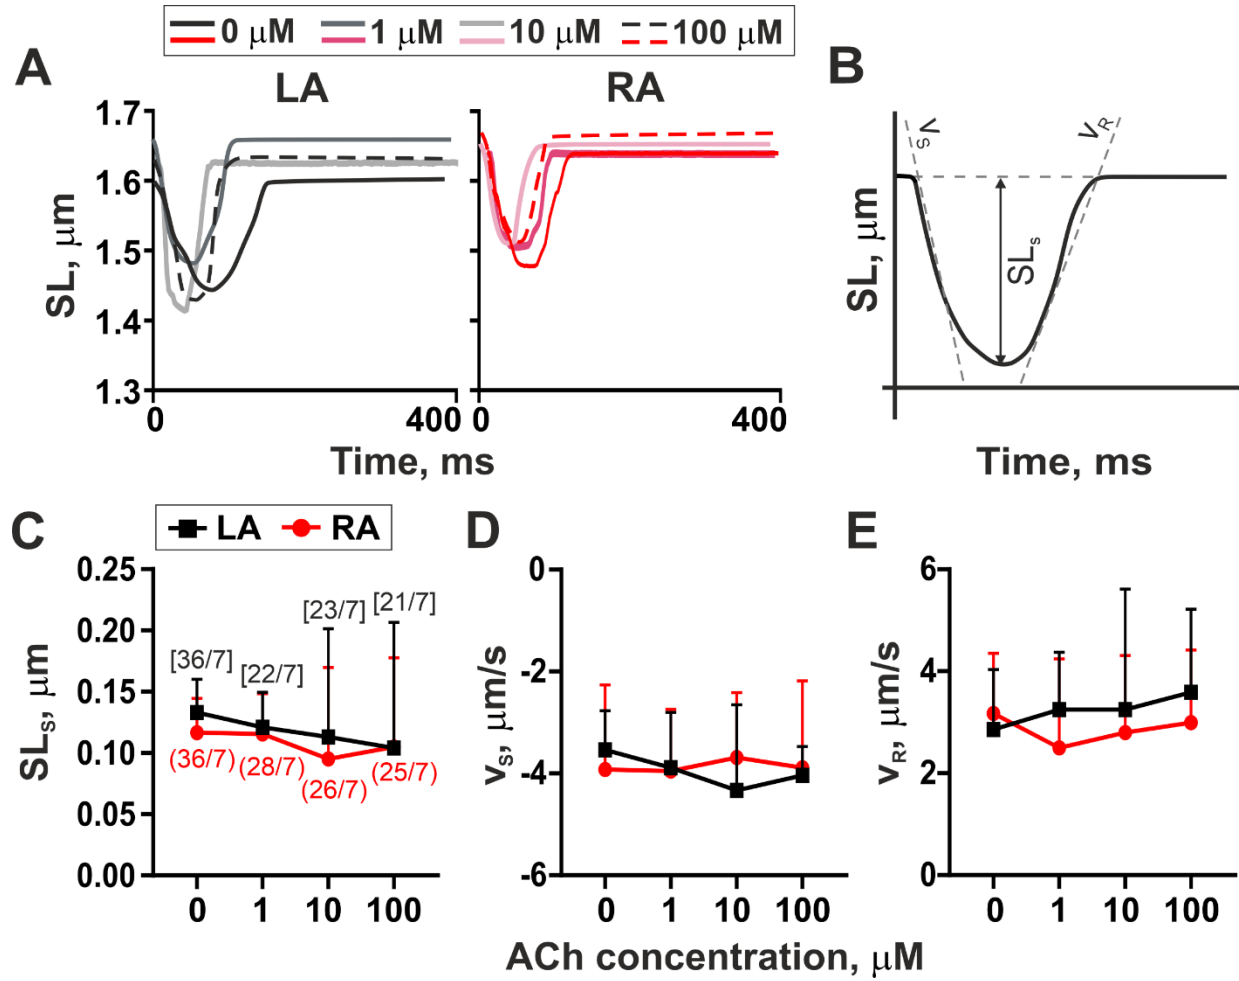

**Figure S1.** Dose-response curves of the amplitude and velocities of sarcomere shortening-relengthening in single mechanically non-loaded LA and RA cardiomyocytes to 1–100  $\mu\text{M}$  acetylcholine (ACh). (A) Representative recordings of time-dependent sarcomere length (SL) changes in LA and RA cardiomyocytes from the control group (0  $\mu\text{M}$ ) and after incubation with ACh for 10–15 min. (B). Analyzed parameters derived from SL change signal. (C) Absolute SL shortening amplitude ( $\text{SL}_s$ ). (D) Maximum velocity of sarcomere shortening ( $v_s$ ). (E) Maximum velocity of sarcomere relengthening ( $v_R$ ). The number of  $n$  cells from  $N$  hearts ( $n/N$ ) is shown in square brackets [LA] or parentheses (RA) in the (C) panel. Values are plotted as medians with interquartile ranges. \* $p < 0.05$ : 1, 10, and 100  $\mu\text{M}$  ACh compared to the control group (0  $\mu\text{M}$  ACh); one-way ANOVA ( $\text{SL}_s$ ) and Kruskal-Wallis test ( $v_s$  and  $v_R$ ).

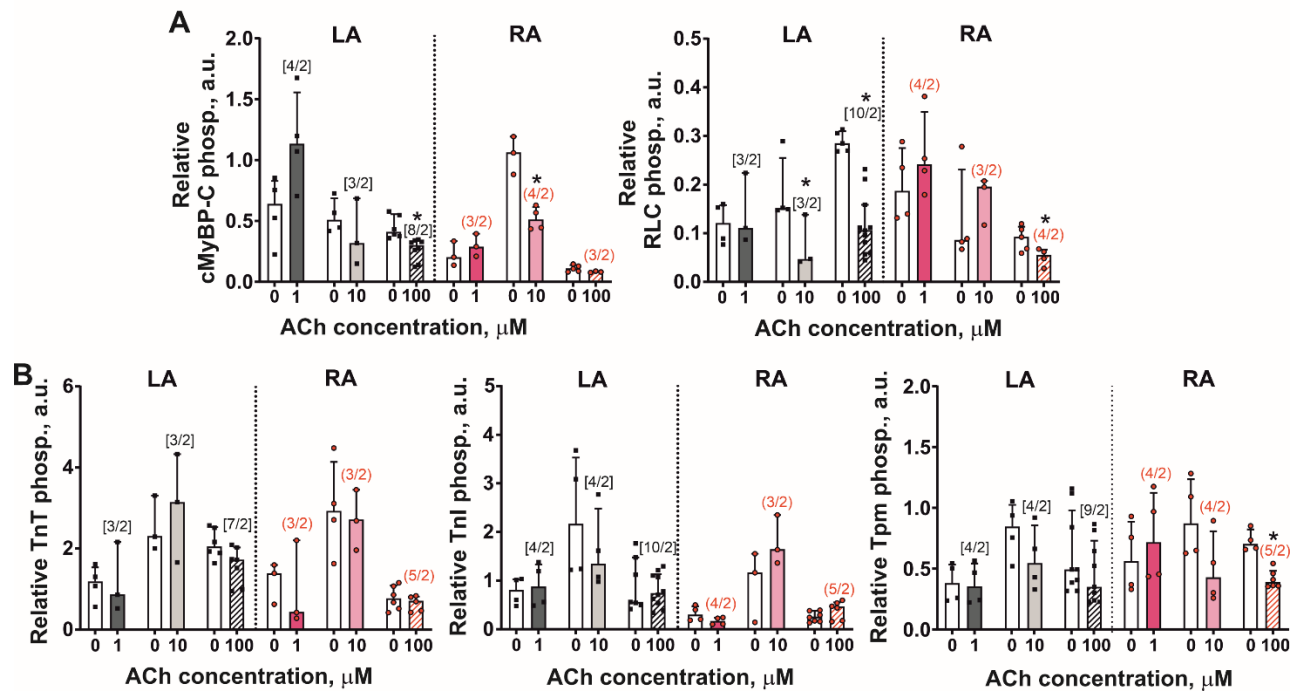

**Figure S2.** The acute effects of ACh on sarcomeric protein phosphorylation in LA and RA cardiomyocytes. cMyBP-C – cardiac myosin binding protein-C; RLC – myosin regulatory light chain; TnT – troponin T; TnI – troponin I; Tpm – tropomyosin. (A) Phosphorylation levels of cMyBP-C and RLC. (B) Phosphorylation levels of TnT, TnI, and Tpm. Phosphorylation is expressed as the ratio of the intensities of protein bands stained with Pro-Q Diamond and SYPRO Ruby. The same hearts were used for ACh groups and individual controls (stained together with ACh groups). The number of *n* samples from *N* hearts is shown in square brackets [LA] or parentheses (RA). Data are presented as dots (values) and medians (boxes) with interquartile range (bars). \**p* < 0.05: 1, 10, and 100  $\mu\text{M}$  ACh compared to the individual control group (0  $\mu\text{M}$  ACh), Mann-Whitney U-test.
